# Supplementary material for: Genotypic Response of Finger Millet to Zinc and Iron Agronomic Biofortification, Location and Slope Position towards Yield
Source: MDPI journal article supplement (doi:10.3390/agronomy13061452), 2023-05-24
Supplement: s1 [file s1]

## Experimental design of the field treatment

Design: CRBD at slope position level (n=3 genotypes x 5 level fertilizer application x 4 replications).

Slope class: Hill slope

Farmer 1

|                                                                                |                                                                                   |                                                                               |                                                                                |                                                                            |
|--------------------------------------------------------------------------------|-----------------------------------------------------------------------------------|-------------------------------------------------------------------------------|--------------------------------------------------------------------------------|----------------------------------------------------------------------------|
| <b>Diga-01</b><br>NPKS<br><b>Urji</b><br>NPKS+Zn+ Fe<br><b>Meba</b><br>NPKS+Zn | <b>Meba</b><br>30%NPKS<br><b>Diga-01</b><br>NPKS+Zn+ Fe<br><b>Urji</b><br>NPKS+Fe | <b>Diga-01</b><br>NPKS+Zn<br><b>Urji</b><br>30%NPKS<br><b>Meba</b><br>NPKS+Fe | <b>Urji</b><br>NPKS<br><b>Meba</b><br>NPKS+Zn+ Fe<br><b>Diga-01</b><br>30%NPKS | <b>Meba</b><br>NPKS<br><b>Diga-01</b><br>NPKS+Fe<br><b>Urji</b><br>NPKS+Zn |
|--------------------------------------------------------------------------------|-----------------------------------------------------------------------------------|-------------------------------------------------------------------------------|--------------------------------------------------------------------------------|----------------------------------------------------------------------------|

Farmer 2

|                                                                                |                                                                            |                                                                                   |                                                                                |                                                                               |
|--------------------------------------------------------------------------------|----------------------------------------------------------------------------|-----------------------------------------------------------------------------------|--------------------------------------------------------------------------------|-------------------------------------------------------------------------------|
| <b>Meba</b><br>NPKS+Zn+ Fe<br><b>Diga-01</b><br>NPKS<br><b>Urji</b><br>NPKS+Zn | <b>Diga-01</b><br>NPKS+Fe<br><b>Urji</b><br>NPKS<br><b>Meba</b><br>30%NPKS | <b>Meba</b><br>NPKS+Fe<br><b>Urji</b><br>30%NPKS<br><b>Diga-01</b><br>NPKS+Zn+ Fe | <b>Diga-01</b><br>NPKS+Zn<br><b>Meba</b><br>NPKS<br><b>Urji</b><br>NPKS+Zn+ Fe | <b>Urji</b><br>NPKS+Fe<br><b>Diga-01</b><br>30%NPKS<br><b>Meba</b><br>NPKS+Zn |
|--------------------------------------------------------------------------------|----------------------------------------------------------------------------|-----------------------------------------------------------------------------------|--------------------------------------------------------------------------------|-------------------------------------------------------------------------------|

Farmer 3

|                                                                                |                                                                                   |                                                                            |                                                                                |                                                                               |
|--------------------------------------------------------------------------------|-----------------------------------------------------------------------------------|----------------------------------------------------------------------------|--------------------------------------------------------------------------------|-------------------------------------------------------------------------------|
| <b>Urji</b><br>NPKS+Zn<br><b>Meba</b><br>NPKS<br><b>Diga-01</b><br>NPKS+Zn+ Fe | <b>Meba</b><br>30%NPKS<br><b>Urji</b><br>NPKS+Zn+ Fe<br><b>Diga-01</b><br>NPKS+Fe | <b>Diga-01</b><br>30%NPKS<br><b>Urji</b><br>NPKS<br><b>Meba</b><br>NPKS+Zn | <b>Meba</b><br>NPKS+Zn+ Fe<br><b>Diga-01</b><br>NPKS<br><b>Urji</b><br>NPKS+Fe | <b>Diga-01</b><br>NPKS+Zn<br><b>Meba</b><br>NPKS+Fe<br><b>Urji</b><br>30%NPKS |
|--------------------------------------------------------------------------------|-----------------------------------------------------------------------------------|----------------------------------------------------------------------------|--------------------------------------------------------------------------------|-------------------------------------------------------------------------------|

Farmer 4

|                                                                                  |                                                                                 |                                                                                   |                                                                               |                                                                         |
|----------------------------------------------------------------------------------|---------------------------------------------------------------------------------|-----------------------------------------------------------------------------------|-------------------------------------------------------------------------------|-------------------------------------------------------------------------|
| <b>Diga-01</b><br>30%NPKS<br><b>Diga-01</b><br>NPKS+Zn<br><b>Meba</b><br>30%NPKS | <b>Urji</b><br>NPKS<br><b>Meba</b><br>NPKS+Zn+ Fe<br><b>Urji</b><br>NPKS+Zn+ Fe | <b>Urji</b><br>30%NPKS<br><b>Diga-01</b><br>NPKS+Zn+ Fe<br><b>Meba</b><br>NPKS+Zn | <b>Meba</b><br>NPKS+Fe<br><b>Urji</b><br>30%NPKS<br><b>Diga-01</b><br>NPKS+Fe | <b>Diga-01</b><br>NPKS<br><b>Urji</b><br>NPKS+Fe<br><b>Meba</b><br>NPKS |
|----------------------------------------------------------------------------------|---------------------------------------------------------------------------------|-----------------------------------------------------------------------------------|-------------------------------------------------------------------------------|-------------------------------------------------------------------------|

Slope class: Foot slope

Farmer 1

|                |                |                |                |                |
|----------------|----------------|----------------|----------------|----------------|
| <b>Diga-01</b> | <b>Meba</b>    | <b>Diga-01</b> | <b>Urji</b>    | <b>Meba</b>    |
| NPKS           | 30%NPKS        | NPKS+Zn        | NPKS           | NPKS           |
| <b>Urji</b>    | <b>Diga-01</b> | <b>Urji</b>    | <b>Meba</b>    | <b>Diga-01</b> |
| NPKS+Zn+ Fe    | NPKS+Zn+ Fe    | 30%NPKS        | NPKS+Zn+ Fe    | NPKS+Fe        |
| <b>Meba</b>    | <b>Urji</b>    | <b>Meba</b>    | <b>Diga-01</b> | <b>Urji</b>    |
| NPKS+Zn        | NPKS+Fe        | NPKS+Fe        | 30%NPKS        | NPKS+Zn        |

Farmer 2

|                |                |                |                |                |
|----------------|----------------|----------------|----------------|----------------|
| <b>Meba</b>    | <b>Diga-01</b> | <b>Meba</b>    | <b>Diga-01</b> | <b>Urji</b>    |
| NPKS+Zn+ Fe    | NPKS+Fe        | NPKS+Fe        | NPKS+Zn        | NPKS+Fe        |
| <b>Diga-01</b> | <b>Urji</b>    | <b>Urji</b>    | <b>Meba</b>    | <b>Diga-01</b> |
| NPKS           | NPKS           | 30%NPKS        | NPKS           | 30%NPKS        |
| <b>Urji</b>    | <b>Meba</b>    | <b>Diga-01</b> | <b>Urji</b>    | <b>Meba</b>    |
| NPKS+Zn        | 30%NPKS        | NPKS+Zn+ Fe    | NPKS+Zn+ Fe    | NPKS+Zn        |

Farmer 3

|                |                |                |                |                |
|----------------|----------------|----------------|----------------|----------------|
| <b>Urji</b>    | <b>Meba</b>    | <b>Diga-01</b> | <b>Meba</b>    | <b>Diga-01</b> |
| NPKS+Zn        | 30%NPKS        | 30%NPKS        | NPKS+Zn+ Fe    | NPKS+Zn        |
| <b>Meba</b>    | <b>Urji</b>    | <b>Urji</b>    | <b>Diga-01</b> | <b>Meba</b>    |
| NPKS           | NPKS+Zn+ Fe    | NPKS           | NPKS           | NPKS+Fe        |
| <b>Diga-01</b> | <b>Diga-01</b> | <b>Meba</b>    | <b>Urji</b>    | <b>Urji</b>    |
| NPKS+Zn+ Fe    | NPKS+Fe        | NPKS+Zn        | NPKS+Fe        | 30%NPKS        |

Farmer 4

|                |             |                |                |                |
|----------------|-------------|----------------|----------------|----------------|
| <b>Diga-01</b> | <b>Urji</b> | <b>Urji</b>    | <b>Meba</b>    | <b>Diga-01</b> |
| 30%NPKS        | NPKS        | 30%NPKS        | NPKS+Fe        | NPKS           |
| <b>Diga-01</b> | <b>Meba</b> | <b>Diga-01</b> | <b>Urji</b>    | <b>Urji</b>    |
| NPKS+Zn        | NPKS+Zn+ Fe | NPKS+Zn+ Fe    | 30%NPKS        | NPKS+Fe        |
| <b>Meba</b>    | <b>Urji</b> | <b>Meba</b>    | <b>Diga-01</b> | <b>Meba</b>    |
| 30%NPKS        | NPKS+Zn+ Fe | NPKS+Zn        | NPKS+Fe        | NPKS           |
